# Supplementary material
Source: HighWire-hosted journal article supplement (https://lupus.bmj.com/content/9/1/e000564)
Supplement: inline-supplementary-material-2 [file inline-supplementary-material-2.pdf]

**Supplemental Table 2.** Comparison of Sensitivity, Specificity, PPV and NPV between Risk Calculators among patients **Age ≥ 40 years (n=158)**

|                    | <b>Sensitivity<br/>(%, 95% CI)</b> | <b>Specificity<br/>(%, 95% CI)</b> | <b>PPV<br/>(%, 95% CI)</b> | <b>NPV<br/>(%, 95% CI)</b> |
|--------------------|------------------------------------|------------------------------------|----------------------------|----------------------------|
| QRISK3 >10%        | 32.4 (17.4 - 50.5)                 | 82.5 (74.5 - 88.8)                 | 34.4 (22.0 - 49.4)         | 81.2 (77.1 - 84.4)         |
| QRISK3 >20%        | 17.7 (6.8 - 34.5)                  | 97.5 (92.9 - 99.5)                 | 66.7 (34.5 - 88.4)         | 80.8 (78.3 - 83.2)         |
| ASCVD >10%         | 12.2 (4.1 - 26.2)                  | 94.0 (88.1 - 97.6)                 | 41.7 (19.4 - 68.0)         | 75.3 (72.9 - 77.5)         |
| FRS >10%           | 17.7 (6.8 - 34.5)                  | 92.3(85.9 - 96.4)                  | 40.0 (20.3 - 63.5)         | 79.4 (76.6 - 82.0)         |
| Modified FRS >10%  | 47.0 (29.8 - 64.9)                 | 70.1 (60.9 - 78.2)                 | 31.4 (22.5- 41.8)          | 82.0 (76.5 - 86.5)         |
| High-risk PREDICTS | 76.5 (58.8 - 89.3)                 | 54.2 (44.8 - 63.3)                 | 32.1 (26.5- 38.2)          | 92.1 (88.4 - 94.6)         |

CI = confidence interval; PPV = positive predictive value; NPV = negative predictive value; ASCVD = Atherosclerotic Cardiovascular Disease; FRS = Framingham Risk Score; PREDICTS = Predictors of Risk for Elevated Flares, Damage Progression, and Increased Cardiovascular Disease in Patients with SLE.
